# Supplementary material for: Prevalence of Depression in Medical Students at the Lebanese University and Exploring its Correlation With Facebook Relevance: A Questionnaire Study
Source: PubMed Central journal article supplement (PMC4908302; doi:10.2196/resprot.4551), 2016-05-31
Supplement: resprot_v5i2e96_app1.pdf [file resprot_v5i2e96_app1.pdf]

## Facebook Resorting Questionnaire (FbRQ)

|                                               |           |            |
|-----------------------------------------------|-----------|------------|
| <b><i>Do you have a facebook account?</i></b> | <b>No</b> | <b>Yes</b> |
|-----------------------------------------------|-----------|------------|

Mark your answer by a signal.

|                                                                                                                                                                             | <b>No</b> | <b>Yes</b> |
|-----------------------------------------------------------------------------------------------------------------------------------------------------------------------------|-----------|------------|
| <b>1.</b> Do you like topics on fb that you couldn't own, meet, visit.. in your real life?                                                                                  | 0         | 1          |
| <b>2.</b> Do you have the habit to tag your current location wherever you go?                                                                                               | 0         | 1          |
| <b>3.</b> Do you feel that fb is a way to express your feelings or whatever you want to declare in your real life and you do better in expressing on fb than on real scale? | 0         | 1          |
| <b>4.</b> When you want to meet someone, do you feel that fb, by the feature 'add friend' and further chatting, make you more comfortable than verbal meeting?              | 0         | 1          |
| <b>5.</b> Do you think that fb- by posting photos- save your life-best-moments and help you evoke your positive memories?                                                   | 0         | 1          |
| <b>6.</b> Is fb a way to show the best out of your life?                                                                                                                    | 0         | 1          |
| <b>7.</b> Does fb render your voice audible and your existence noticeable?                                                                                                  | 0         | 1          |

TOTAL:
