# Supplementary material for: Prevalence of Depression in Medical Students at the Lebanese University and Exploring its Correlation With Facebook Relevance: A Questionnaire Study
Source: PubMed Central journal article supplement (PMC4908302; doi:10.2196/resprot.4551), 2016-05-31
Supplement: resprot_v5i2e96_app2.pdf [file resprot_v5i2e96_app2.pdf]

File Number:

## Facebook and Depression

### Paper contents:

- I> Consent
- II> PHQ-9 scale
- III> FBAQ scale
- IV> SD scale
